# Supplementary material for: Inert hydrophilic particles enhance the thermal properties and structural resilience of meat protein gels during heating
Source: Royal Society of Chemistry journal article supplement (doi:10.1039/d0fo02169e), 2020-12-15
Supplement: d0fo02169e1.pdf [file d0fo02169e1.pdf]

1 **Figure A1:** Thermal profiles of meat product samples with various fat content FBP (labels of  
2 samples see **Table 1**) in a casing with a diameter of 90 mm.

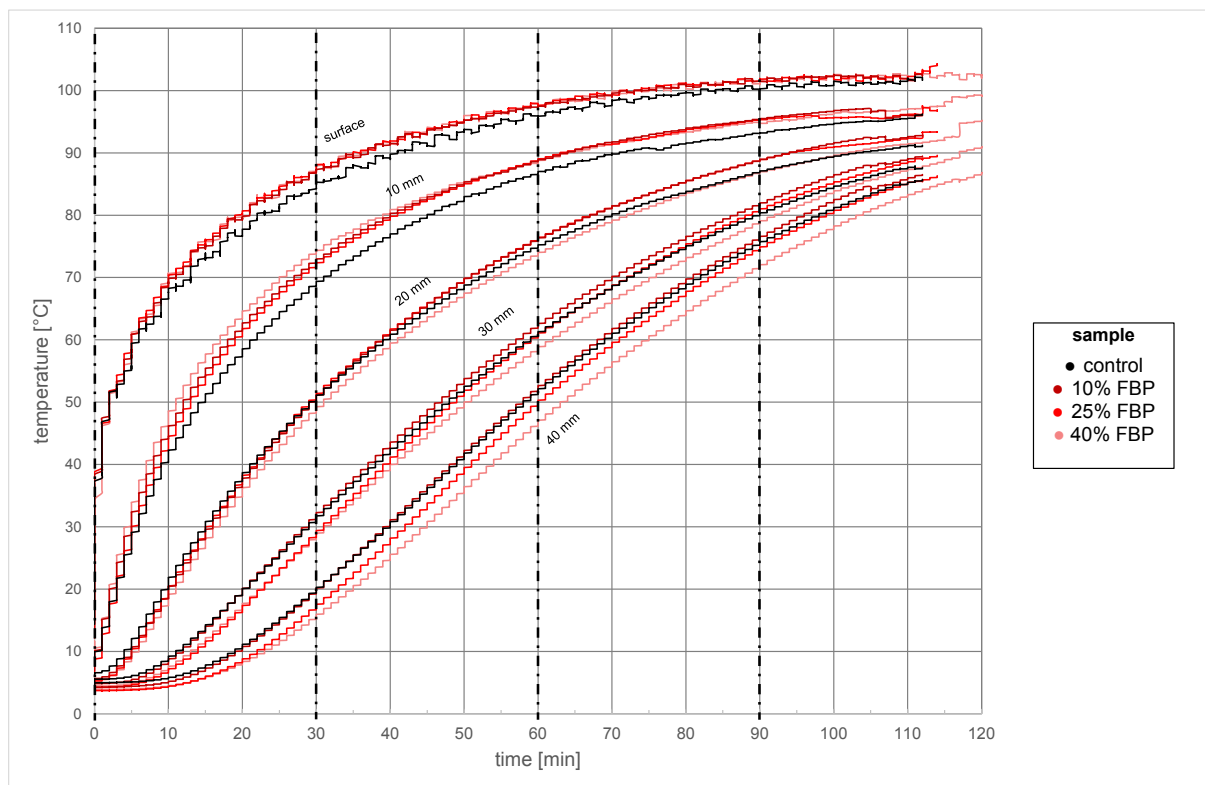

3

4 **Figure A2:** Thermal profiles of meat product samples with various content of inert material  
5 IGP (labels of samples see **Table 1**) in a casing with a diameter of 90 mm.

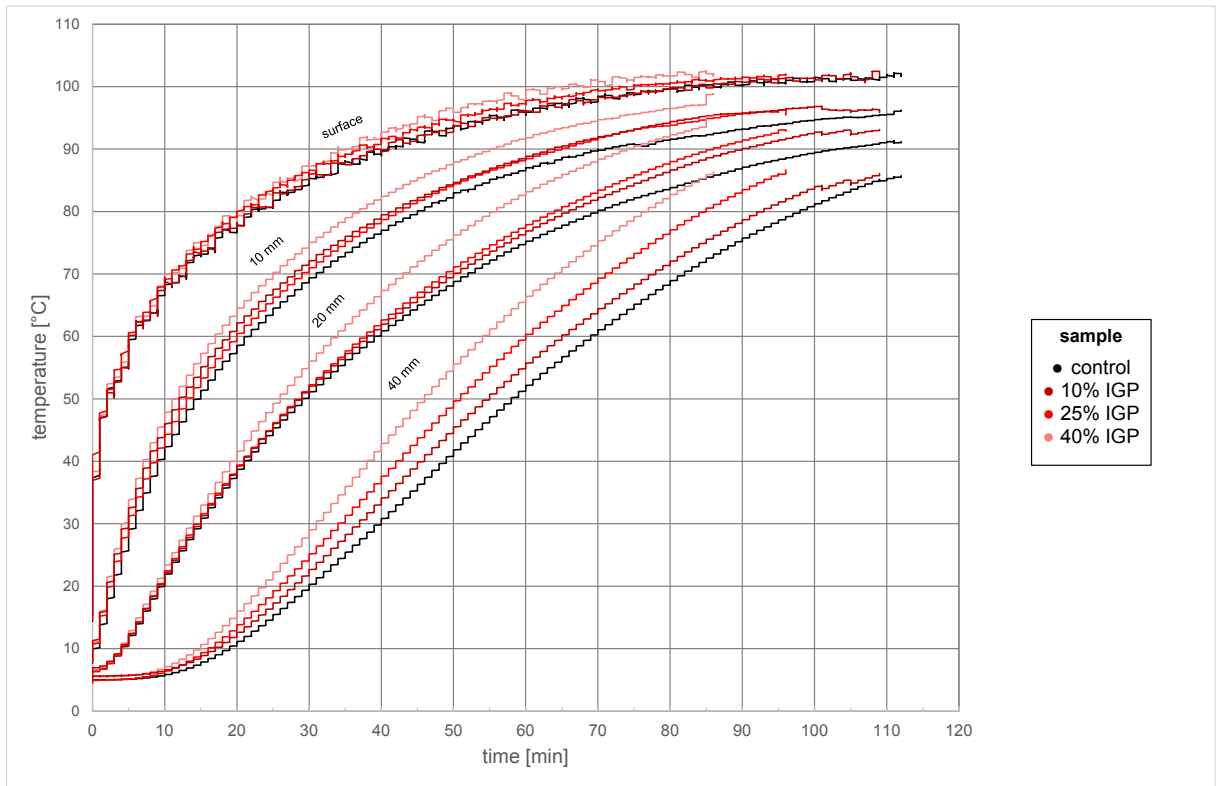

6

7
